## From toxic waste to beneficial nutrient: acetate boosts *Escherichia coli* growth at low glycolytic flux.

Pierre Millard<sup>a,b,\*</sup>, Sandrine Uttenweiler-Joseph<sup>a</sup>, Brice Enjalbert<sup>a</sup>.

<sup>a</sup>TBI, Université de Toulouse, CNRS, INRAE, INSA, Toulouse, France.

<sup>b</sup>MetaToul-MetaboHUB, National infrastructure of metabolomics and fluxomics, Toulouse, France.

\*Pierre Millard, MetaSys team, Toulouse Biotechnology Institute, INSA Toulouse, 135 avenue de Rangueil, 31077 Toulouse, France. +33 (0)5 61 55 93 55

**Email:** pierre.millard@insa-toulouse.fr

**Author Contributions:** B.E., P.M. and S.U.-J. designed research; B.E. and P.M. performed research; B.E., P.M., and S.U.-J. contributed reagents/analytic tools/strains; B.E. and P.M. analyzed data; and B.E., P.M., and S.U.-J. wrote the paper.

**Keywords:** *Escherichia coli*, metabolism, control, robustness, acetate.

## Abstract

Acetate is a major by-product of glycolytic metabolism in *Escherichia coli* and many other microorganisms. It has long been considered a toxic waste compound that inhibits microbial growth, but this counterproductive auto-inhibition, which represents a major problem in biotechnology, has puzzled the scientific community for decades. Recent studies have revealed that acetate is also a co-substrate of glycolytic nutrients and a global regulator of *E. coli* metabolism and physiology. However, most of these insights were obtained at high glycolytic flux and little is known about the role of acetate at lower glycolytic fluxes, conditions that are nevertheless frequently experienced by *E. coli* in natural, industrial and laboratory environments. Here, we used a systems biology strategy to investigate the mutual regulation of glycolytic and acetate metabolism. Computational and experimental results demonstrate that reducing the glycolytic flux enhances co-utilization of acetate and glucose through the Pta-AckA pathway. Enhanced acetate metabolism compensates for the reduction in glycolytic flux and eventually buffers carbon uptake so that acetate, far from being toxic, actually enhances *E. coli* growth under these conditions. The same mechanism of increased growth was also observed on glycerol and galactose, two nutrients with a natively low glycolytic flux. Therefore, acetate makes *E. coli* more robust to glycolytic perturbations and is a valuable nutrient, with a beneficial effect on microbial growth. Finally, we show that some evolutionarily conserved design principles of eukaryotic fermentative metabolism are also present in bacteria.

## Significance Statement

Acetate, a by-product of glycolytic metabolism in many microorganisms including *Escherichia coli*, is traditionally viewed as a toxic waste compound. Here, we demonstrate that this is only the case at high glycolytic fluxes. At low glycolytic fluxes in contrast, acetate acts as a co-substrate of glycolytic nutrients and boosts *E. coli* growth. Acetate also improves *E. coli*'s robustness to glycolytic perturbations. We clarify the functional relationship between glycolytic and acetate metabolisms, show that acetate is a beneficial co-substrate of glycolytic nutrients used by *E. coli* in bioprocesses and in the gut, and provide insights into the underlying biochemical and regulatory mechanisms.

## Introduction

Metabolism is the fundamental biochemical process that converts nutrients into energy and cellular building blocks. The preferred nutrients of many organisms are glycolytic substrates, such as glucose, which are oxidized into pyruvate by glycolysis. In the presence of oxygen, pyruvate can then be fully oxidized into carbon dioxide and water via respiratory pathways involving the tricarboxylic acid (TCA) cycle and oxidative phosphorylation. When oxygen is limiting, pyruvate is incompletely oxidized through non-respiratory pathways, and fermentation by-products are released into the environment. Despite fermentation being less efficient than respiration, fermentation by-products are still released in the presence of oxygen by most microorganisms, including bacteria (1), yeasts (2) and mammalian cells (3).

Acetate is one of the most common by-products of glycolytic metabolism in *Escherichia coli* and many other microorganisms (1, 4, 5). The established view is that acetate and other fermentation by-products are toxic and inhibit microbial growth (4-14). Why *E. coli* should produce a self-toxic by-product is an intriguing question, particularly since *E. coli*'s natural environment, the gut, is acetate-rich. Several explanations for the toxic effect of acetate have been proposed, the classical one being the uncoupling effect of organic acids (8), with acetic acid freely diffusing through the membrane before dissociating intracellularly into acetate and a proton due to its low pKa, and the energy required to expel the excess protons from the cell to maintain pH homeostasis being detrimental to growth. Another hypothesis is that the presence of acetate in the cytoplasm may affect the anion balance of the cell (9), reducing the pool of other anions – primarily glutamate – available to maintain osmotic pressure and electroneutrality and thereby impeding cell function. Acetate has also been reported to inhibit a step in the methionine biosynthesis pathway (10), reducing the intracellular methionine pool and concomitantly increasing the concentration of the toxic intermediate homocysteine. Finally, acetate may modulate the accumulation of acetyl-phosphate (15, 16), an intermediate of the acetate pathway and a signaling metabolite that can phosphorylate and acetylate enzymes and regulatory proteins with broad physiological consequences. However, none of these studies conclusively explain how acetate inhibits microbial growth (13). The physiological role of fermentation under aerobic conditions also remains unclear, especially since it leads to the accumulation of toxic by-products at the expense of biomass production.

Acetate overflow and its impact on *E. coli* are also important issues in biotechnology, where acetate is both produced from glycolytic carbon sources and found in many renewable resources (4, 5, 17-19). As well as inhibiting growth, acetate production diverts carbon that could otherwise be used to synthesize biomass or valuable compounds. Acetate therefore decreases the productivity of bioprocesses. Since acetate is only produced at high glucose uptake rates (20-22), a common approach to reduce acetate overflow is to limit glucose uptake by process engineering (e.g. glucose-limited chemostat or fed-batch culture) or by metabolic engineering (e.g. deletion of glucose transporters) (5, 7, 23-27). The utilization of acetate in combination with glycolytic substrates could alleviate growth inhibition and allow acetate to act as both a renewable carbon source and a relevant (co-)substrate for bioproducts that are derived from acetyl-CoA (5, 26, 28, 29). However, despite decades of attempts to reduce its accumulation and improve its utilization, acetate is still considered a major problem in biotechnology (7, 13, 24, 27).

Recently, we found that acetate can also act as a co-substrate for glycolytic carbon sources such as glucose, fucose and gluconate (12), and is therefore more than just a waste by-product. The switch between acetate production and consumption was found to be determined thermodynamically by the acetate concentration itself. Acetate is also a global regulator of *E. coli* metabolism and physiology (30). These observations suggest an alternative rationale for acetate toxicity, namely that the inhibition of growth and glucose uptake may result from coordinated downregulation of the expression of most central metabolic genes (glucose uptake systems, glycolysis, TCA cycle) and ribosomal genes. To date, the role of acetate as a co-substrate and

regulator of glycolytic metabolism has only been investigated under high glycolytic flux, and little is known about the response of *E. coli* to acetate at low glycolytic fluxes, conditions that are nevertheless commonly experienced by this bacterium in its natural, industrial and laboratory environments (31-39).

In this study, we took a systems biology approach to clarify the interplay between glycolytic and acetate metabolism in *E. coli*. We used a kinetic model of *E. coli* metabolism to generate hypotheses on the relationships between glycolytic, acetate and growth fluxes. We validated model predictions experimentally, explored the underlying biochemical and regulatory mechanisms on glucose, and extended our findings to two other glycolytic nutrients.

## Results

**Model-driven hypotheses on the interplay between glucose and acetate metabolism in *Escherichia coli*.** We explored the functional relationship between glycolytic and acetate metabolism in *Escherichia coli* using a coarse-grained kinetic model coupling glucose and acetate metabolism with growth (Figure 1A) (30). The model included two compartments, six compounds, and six reactions representing (i) glucose uptake and its conversion into acetyl-CoA by glycolysis, (ii) acetyl-CoA utilization in the TCA cycle and anabolic growth pathways, and (iii) the reversible conversion of acetyl-CoA into acetate via phosphotransacetylase (Pta), acetate kinase (AckA), and acetate exchange between the cell and its environment. Acetate utilization via acetylCoA synthetase (Acs), which is not active when glucose is present (12), is not included in the model. This model has been extensively validated and shown to have good predictive capabilities (30). We used it to simulate the response of glycolytic, acetate and growth fluxes to different degrees of glycolytic limitation by progressively reducing the activity (i.e.  $V_{max}$ ) of the glycolytic pathway – and thereby the glycolytic flux – from 100 % to 20 % of its initial value. Since glycolytic and acetate fluxes are both determined by the concentration of acetate (12, 13, 30), these simulations were carried out over a broad range of acetate concentrations (from 0.1 to 100 mM).

The results obtained (Figure 1B-D) highlight the strong bidirectional interplay between glycolytic and acetate metabolism, which eventually modulate growth. Glucose uptake and acetate flux both respond nonlinearly to perturbations (Figure 1B-C). According to the model, increasing the acetate concentration inhibits glycolysis (Figure 1B) and reverses the acetate flux (Figure 1C) over the full range of glycolytic fluxes, as previously reported at the highest glucose uptake rate (30). The acetate concentration at which the flux reversal occurs appears to depend on the glycolytic flux (Figure 1C). Reducing the glycolytic flux lowers acetate production when acetate is a by-product of glucose metabolism, but seems to enhance acetate utilization when acetate is a co-substrate of glucose (Figure 1C). Finally, the glycolytic flux and the acetate concentration both have a strong, nonlinear effect on the growth rate (Figure 1D). At maximal glycolytic activity, the predictions of the model are consistent with the established deleterious effect of acetate on microbial growth (Figure 1D). However, the model also predicts that at lower glycolytic flux, increasing the acetate concentration should boost *E. coli* growth (Figure 1D). We present these model-driven hypotheses in detail in the following sections along with experimental results collected for validation. Note that the data obtained in this study were not used to build or calibrate the model and therefore represent independent tests of its predictions and inferred hypotheses.

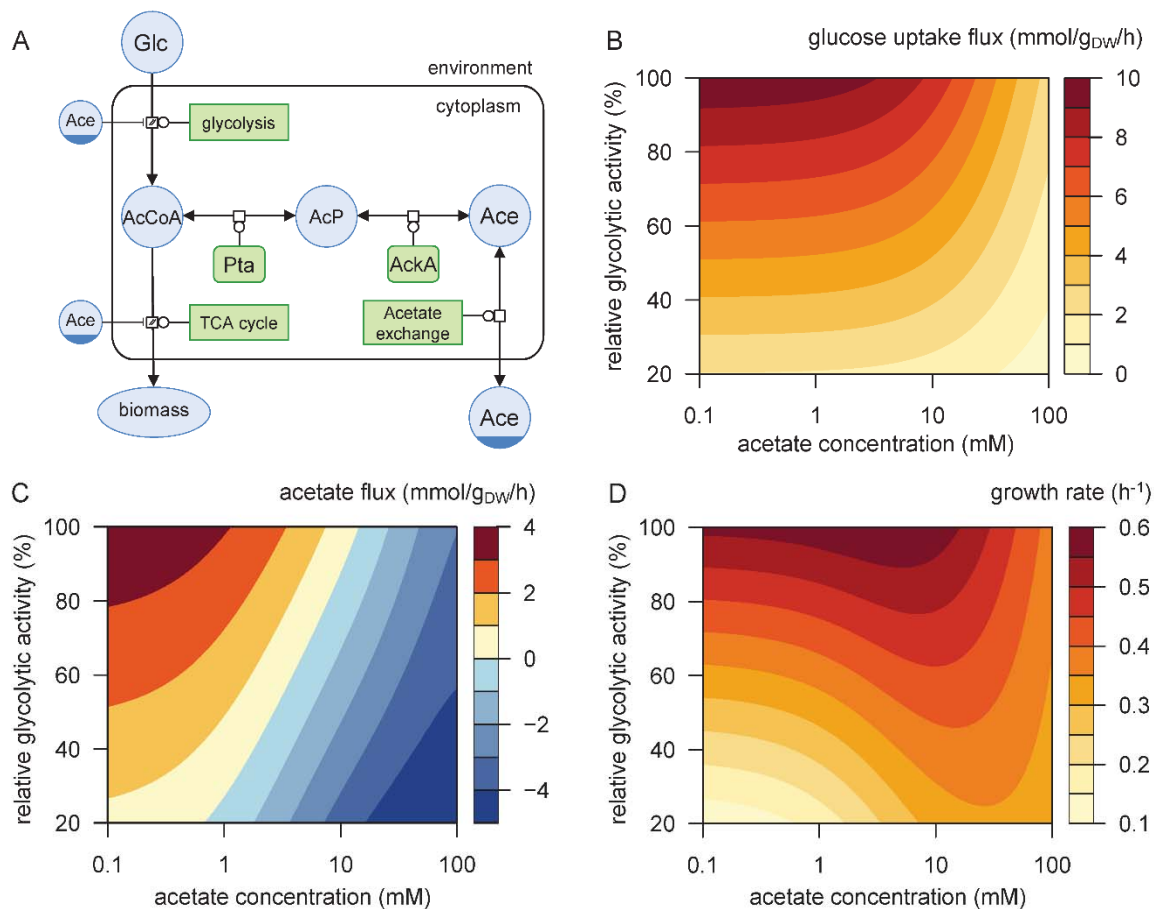

**Figure 1.** Predicted response of *E. coli* to glycolytic and acetate perturbations. (A) Representation (in Systems Biology Graphical Notation format, <http://sbgn.org>) of the glucose and acetate metabolism of *Escherichia coli*, as implemented in the kinetic model used in the study (reproduced from Millard et al. (30)). (B) Glucose uptake flux, (C) acetate flux and (D) growth rate simulated over a broad range of glycolytic activity levels (from 20 to 100 % of the initial  $V_{max}$ ) and acetate concentrations (from 0.1 to 100 mM).

**Enhanced acetate utilization at low glycolytic flux buffers carbon uptake.** At low acetate concentrations, acetate production is predicted to increase with the glycolytic flux (Figure 1C), in line with the relationship observed in glucose-limited chemostat experiments (20-22) and in a set of mutants with different levels of glucose uptake (23). In contrast, when the acetate concentration is high, such that it is co-consumed with glucose, acetate utilization is expected to decrease when the glycolytic flux increases (Figure 1C). This response implies, as suggested previously (30) but never verified experimentally, that the control exerted by glycolysis on the acetate flux is non-monotonic.

To test this hypothesis, we measured growth, glucose uptake, and acetate fluxes in *E. coli* K-12 MG1655 grown on 15 mM glucose and increased the concentration of the glycolytic inhibitor methyl  $\alpha$ -D-glucopyranoside ( $\alpha$ MG, an analogue of glucose that is taken up and phosphorylated but not metabolized by glycolysis) (40, 41) (Figure 2A-C). Experiments were carried out without acetate and with 30 mM acetate. Results confirm that  $\alpha$ MG inhibits glucose uptake under both conditions (Figure 2A). In the absence of acetate, the acetate (production) flux decreased when the  $\alpha$ MG concentration was increased (Figure 2B), as expected based on the positive control exerted by glycolysis on the acetate flux. In contrast, in the presence of 30 mM acetate, increasing the  $\alpha$ MG concentration increased the acetate uptake flux (Figure 2B). These results

are consistent with the predictions of the model and demonstrate that glycolysis controls the acetate flux in a non-monotonic manner. The control exerted by glycolysis on acetate metabolism thus depends on the concentration of acetate itself.

Total carbon uptake decreased when the  $\alpha$ MG concentration was increased in the absence of acetate (Figure 2D), but remained stable in the presence of acetate despite a ~2-fold reduction in glucose uptake (between 5.7 and 3.3  $\text{mmol}\cdot\text{g}_{\text{DW}}^{-1}\cdot\text{h}^{-1}$  with 30 mM acetate; Figure 2A). A strong, nonlinear relationship between glucose uptake and acetate flux was observed in all experiments (Figure 2E), which was reflected in the contribution of acetate to the total carbon uptake of *E. coli* (Figure 2F). At the maximal glucose uptake rate, acetate production represented a 10 % loss in carbon. However, when glucose uptake was below 7  $\text{mmol}\cdot\text{g}_{\text{DW}}^{-1}\cdot\text{h}^{-1}$ , acetate was co-utilized with glucose and contributed positively to the carbon balance (up to 50 % at a glucose uptake rate of 3.3  $\text{mmol}\cdot\text{g}_{\text{DW}}^{-1}\cdot\text{h}^{-1}$ ; Figure 2F). Because acetate compensates for the drop in glucose uptake, the growth rate was less sensitive to glycolytic perturbations in the presence of acetate than in the absence of acetate (Figure 2C). These results highlight the coupling between glycolytic and acetate fluxes in *E. coli*, with acetate buffering carbon uptake at low glycolytic flux, thereby improving the robustness of *E. coli* growth to glycolytic perturbations.

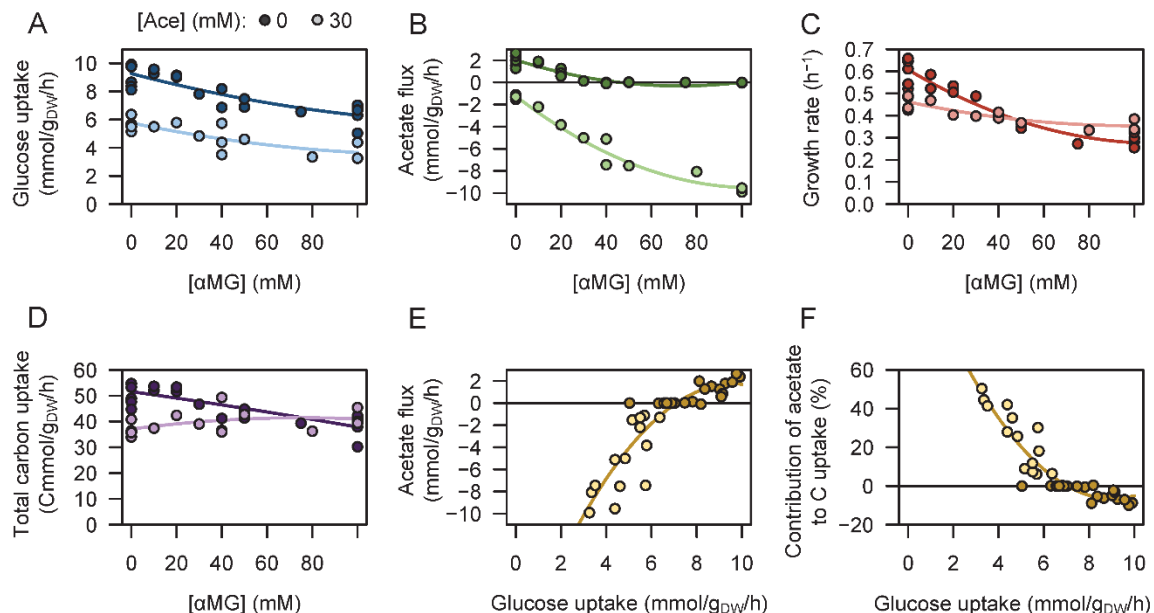

**Figure 2.** Glycolytic control of *E. coli* metabolism. (A) Glucose uptake, (B) acetate flux and (C) growth rate of *E. coli* grown on glucose (15 mM) with different concentrations of  $\alpha$ MG (0–100 mM), at low (0 mM, dark colors) and high (30 mM, light colors) acetate concentrations. These data were used to quantify (D) the total carbon uptake flux as a function of the  $\alpha$ MG concentration, and we identified conserved relationships between (E) the acetate flux and glucose uptake, and between (F) the contribution of acetate to carbon uptake and glucose uptake. Each data point represents an independent biological replicate, and lines represent the best polynomial fits.

**The glycolytic flux determines the acetate concentration threshold at which the acetate flux reverses.** As already reported at maximal glucose uptake rates (12, 30), the acetate concentration threshold at which the acetate flux switches between production and consumption is about 10 mM. However, this threshold is predicted to depend on the glycolytic flux (Figure 1C). According to the model, the switch should occur at an acetate concentration of 3.9 mM when the glycolytic activity is 60 % of its maximum value, and at a concentration of just 0.7 mM when the



glycolytic activity is reduced to 20 % of the maximum. This suggests that the glycolytic flux determines the role of acetate as a co-substrate or by-product of glycolytic metabolism.

We tested this hypothesis by measuring acetate fluxes in *E. coli* grown on glucose (15 mM) plus acetate (from 0.1 to 100 mM) at different concentrations of  $\alpha$ MG (0, 20, 40 or 100 mM, Figure 3). As previously observed at full glycolytic activity (12-14, 30), acetate production decreased at 0 mM  $\alpha$ MG when the acetate concentration was increased (Figure 3), and the acetate flux reversed at a concentration of  $\sim$ 8 mM, resulting in co-consumption of glucose and acetate. This threshold concentration gradually decreased when the glycolytic flux was reduced (from 2 mM acetate at 20 mM  $\alpha$ MG to below 0.1 mM acetate at 40 or 100 mM  $\alpha$ MG). In keeping with the predictions of the model, these results demonstrate that the acetate concentration threshold at which the acetate flux reverses depends on the glycolytic flux. It therefore follows that when the glycolytic flux is limited, acetate is utilized as a co-substrate at lower acetate concentrations. These results also confirm that inhibiting glycolysis enhances acetate utilization over the full range of acetate concentrations tested here, further validating the unusual control patterns identified above, and generalizing their functional relevance for acetate concentrations spanning three orders of magnitude.

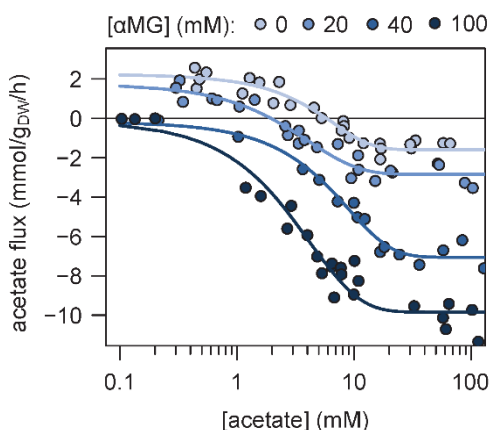

**Figure 3.** Acetate flux reversal is controlled by the glycolytic flux. Acetate flux of *E. coli* grown on glucose (15 mM) at different acetate concentrations in the presence of  $\alpha$ MG (0, 20, 40 or 100 mM, light to dark blue). The data measured in the absence of  $\alpha$ MG are reproduced from Enjalbert et al. (12). Each data point represents an independent biological replicate, and the lines represent best fits using a logistic function.

**Acetate enhances *E. coli* growth at low glycolytic flux.** Acetate is considered toxic for microbial cells, but the model predicts this might not always be the case. At full glycolytic activity, the model predicts that maximal growth should occur at low acetate concentrations, with the growth rate remaining above 95 % of the maximum only at acetate concentrations below 12 mM (Figure 1D). In agreement with the reported toxicity of acetate, the growth rate then monotonously decreases for acetate concentrations above 12 mM. However, when the glycolytic flux is reduced, maximal growth is predicted to occur at high acetate concentrations (Figure 1D). For instance, when the glycolytic activity is reduced to 20 %, the growth rate is expected to be maximal at an acetate concentration of 28 mM, and should remain above 95 % of the maximum over a broad range of acetate concentrations (between 12 and 86 mM). According to the model therefore, acetate should enhance *E. coli* growth at low glycolytic flux.

To test this prediction, we measured the growth rate of *E. coli* on glucose (15 mM) with acetate (0.1 to 100 mM) in the presence of 100 mM  $\alpha$ MG to inhibit glycolysis (Figure 4). The data measured in the absence of  $\alpha$ MG (30) are shown for comparison. At maximal glycolytic flux, the growth rate decreased monotonically with the acetate concentration, but this relationship became non-monotonic when glycolysis was inhibited. In this case, the growth rate was lower in the

absence of acetate than at high acetate concentrations ( $0.28 \pm 0.02 \text{ h}^{-1}$  with acetate  $< 0.5 \text{ mM}$  versus  $0.34 \pm 0.01 \text{ h}^{-1}$  with  $60 \text{ mM}$  acetate). As predicted by the model therefore, acetate appears to be beneficial rather than toxic to *E. coli* when the glycolytic flux is reduced. The growth rate was slightly lower at  $100 \text{ mM}$  acetate ( $0.30 \pm 0.03 \text{ h}^{-1}$ ) than at  $60 \text{ mM}$  acetate, but the similar growth rates observed across the concentration range demonstrate that acetate is not toxic when the glycolytic flux is low, even at high concentrations.

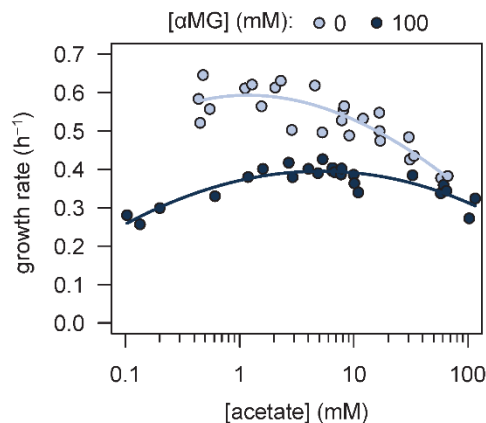

**Figure 4.** Effect of acetate on *E. coli* growth. Growth rate of *E. coli* grown on glucose ( $15 \text{ mM}$ ) as a function of the acetate concentration at high ( $0 \text{ mM}$   $\alpha\text{MG}$ , light blue, reproduced from Enjalbert et al. (12)) or low ( $100 \text{ mM}$   $\alpha\text{MG}$ , dark blue) glycolytic flux. Each data point represents an independent biological replicate and the lines represent best polynomial fits.

**At low glycolytic flux, acetate activates *E. coli* metabolism and growth at the transcriptional level.** At high glycolytic flux, it has been proposed (30) that the apparent “toxicity” of acetate is due to its inhibition of most metabolic genes – including those for the glucose phosphotransferase system (PTS), glycolysis and TCA cycle. Acetate also increases the expression of genes related to stress responses and downregulates genes related to transport, energy biosynthesis and mobility for instance. To determine if acetate has a similar regulatory effect at low glycolytic flux, we compared the transcriptomes of *E. coli* grown on glucose ( $15 \text{ mM}$ ) plus acetate ( $0, 10, 50$  or  $100 \text{ mM}$ ) in the presence of  $\alpha\text{MG}$  ( $100 \text{ mM}$ ), with those measured in the absence of  $\alpha\text{MG}$  at the same acetate concentrations (30).

We observed that contrary to what occurs at maximal glycolytic flux ( $0 \text{ mM}$   $\alpha\text{MG}$ ) acetate did not trigger a stress response at low glycolytic flux ( $100 \text{ mM}$   $\alpha\text{MG}$ ) (Figure 6A). Conversely, acetate increased gene expression for the respiratory chain and some biosynthetic processes (ribonucleotide monophosphate biosynthesis, amino acid production). Other hallmarks of the effect of acetate at maximal glycolytic flux such as the inhibition of mobility-related gene expression were not observed either at low glycolytic flux. The activation of glutamate catabolism, the repression of transport related genes, and the repression of carbohydrate transport and catabolism were among the few similarities between the responses to acetate at high and low glycolytic flux.

At the metabolic level, acetate-driven inhibition of the expression of central metabolic genes (PTS, TCA and glycolytic enzymes) and growth machinery (ribosomal proteins) was not observed at low glycolytic flux (Figure 6B). In fact, expression of most of these genes ( $47/65$ ) was slightly higher in the presence of  $50 \text{ mM}$  acetate and  $100 \text{ mM}$   $\alpha\text{MG}$ , whereas at maximal glycolytic flux it was lower at these acetate concentrations for a similar proportion ( $46/65$ ). When the glycolytic flux was inhibited, *ptsG* expression, which controls glucose uptake (42), was  $70 \%$  higher at  $10$  and  $50 \text{ mM}$  acetate. The expression of most glycolytic genes was  $15$  to  $110 \%$  higher at  $50 \text{ mM}$  acetate, while the expression of TCA cycle genes remained stable. Regarding acetate



metabolism, the expression of *pta* and *ackA* was slightly higher at 10 and 50 mM acetate, while alternative acetate utilization via Acs was inhibited by acetate (5-fold reduction in expression at 100 mM). Finally, expression of genes encoding ribosomal proteins (*rpl*, *rpm* and *rps* operons) was increased by 57 % on average at 50 mM acetate and 48 % on average at 100 mM acetate (Dataset S1).

These results indicate that the stress response and lower metabolic activity triggered by acetate at high glycolytic flux do not occur at low glycolytic flux. In this situation, acetate enhances the expression of ribosomal and central metabolic genes, in line with its positive effect on growth. This is the opposite of what is observed at high glycolytic flux, demonstrating that the regulatory role of acetate is largely determined by the glycolytic flux.

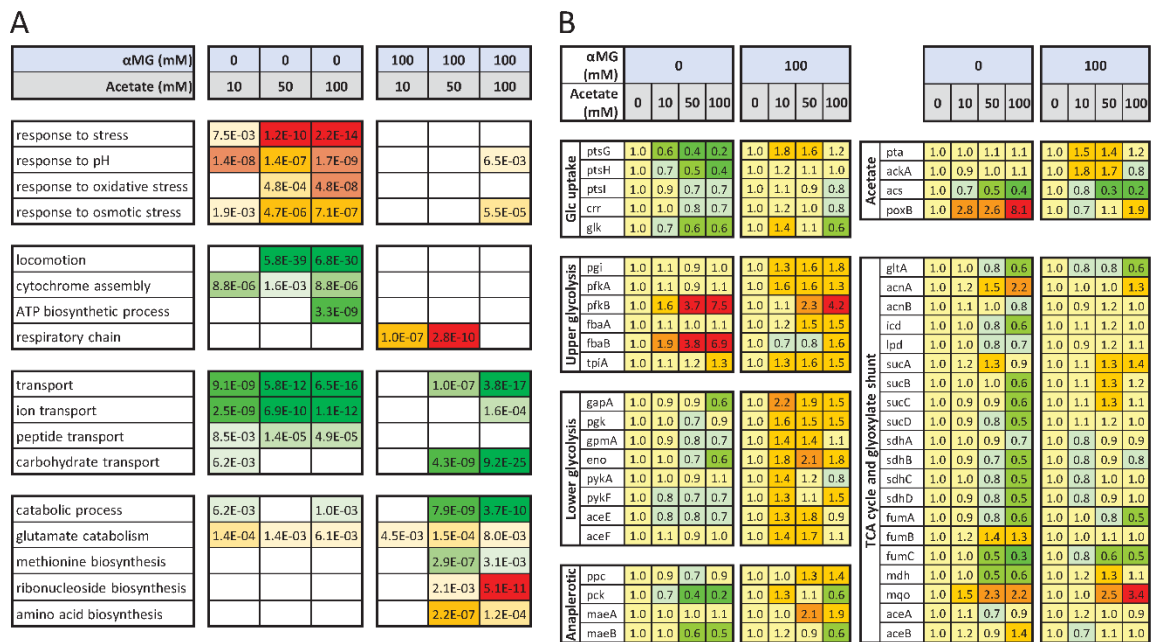

**Figure 5.** Transcriptomic response of *E. coli* to acetate (10, 50 or 100 mM versus 0 mM) at high (0 mM αMG) and low (100 mM αMG) glycolytic flux. The data obtained in the absence of αMG are reproduced from Millard et al. (30). The biological functions modulated by the presence of acetate (based on Gene Ontology analysis) are shown in part (A), with the corresponding p-values. The expression levels of central metabolic genes are shown in part (B). Gene expression is normalized to the value measured at the same αMG concentration but without acetate. Green and red indicate decreased and increased expression, respectively.

**Acetate-enhanced growth is supported by the Pta-AckA pathway.** According to the model (Figure 1A), the bidirectional Pta-AckA pathway (acetate consumption or production) explains by itself how acetate promotes *E. coli* growth, without the need for Acs (acetate consumption only). To confirm this hypothesis, we measured the growth rates of *E. coli* K-12 BW25113 wild-type and of Δ*pta* and Δ*acs* isogenic mutant strains cultivated on 15 mM glucose plus 100 mM αMG, with or without 10 mM acetate. The effect of acetate was quantified as the relative change in growth rate induced. As a control, the wild-type strain was also grown in the absence of αMG, and as expected, acetate reduced the growth of the wild-type strain in the absence of αMG (−6 ± 1 %). In contrast, in the presence of αMG, acetate increased the growth of the wild-type strain (+9 ± 2 %) and of the Δ*acs* strain (+8 ± 1 %). The beneficial effect of acetate on growth was not observed in the Δ*pta* strain, whose growth rate decreased slightly but significantly (−6 ± 1 %). These results confirm that the beneficial effect of acetate on *E. coli* growth at low glycolytic flux is mediated by the Pta-AckA pathway, with no involvement of Acs in this phenomenon.

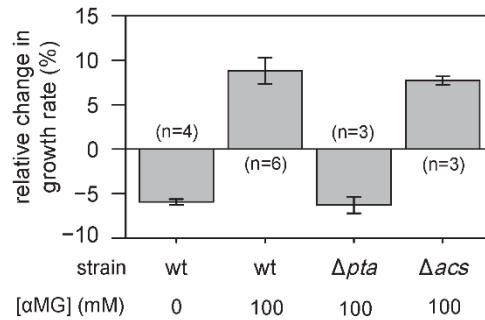

**Figure 6.** Response of wild-type,  $\Delta pta$ , and  $\Delta acs$  strains of *E. coli* to acetate during growth on glucose. Mean relative change in the growth rates of wild-type,  $\Delta pta$ , and  $\Delta acs$  *E. coli* strains in the presence of 10 mM acetate at high (0 mM  $\alpha$ MG) and low (100 mM  $\alpha$ MG) glycolytic flux. Mean values and standard deviations (error bars) were estimated from  $n$  independent biological replicates, as indicated on the figure.

**Acetate boosts growth of *E. coli* on glycerol and galactose.** Assuming that the beneficial impact of acetate on *E. coli* growth stems from the tight interplay of glycolytic and acetate fluxes, this should be independent of the nature of the carbon source, implying that acetate should boost *E. coli* growth on glycolytic substrates with low glycolytic flux, such as glycerol and galactose (43). And indeed, wild-type *E. coli* growth was enhanced on both glycerol ( $+7 \pm 1$  %) and galactose ( $+52 \pm 1$  %) in the presence of 10 mM acetate. Similar levels of enhancement were observed for the  $\Delta acs$  strain ( $+8 \pm 1$  % on glycerol;  $+53 \pm 5$  % on galactose), but not for the  $\Delta pta$  strain ( $-8 \pm 2$  % on glycerol;  $+2 \pm 12$  % on galactose). These results demonstrate that acetate promotes *E. coli* growth on galactose and glycerol. As observed for glucose, the growth enhancement is mediated exclusively by the Pta-AckA pathway, with no involvement of Acs. These results extend and generalize our findings to glycolytic carbon sources other than glucose, without the use of an inhibitor.

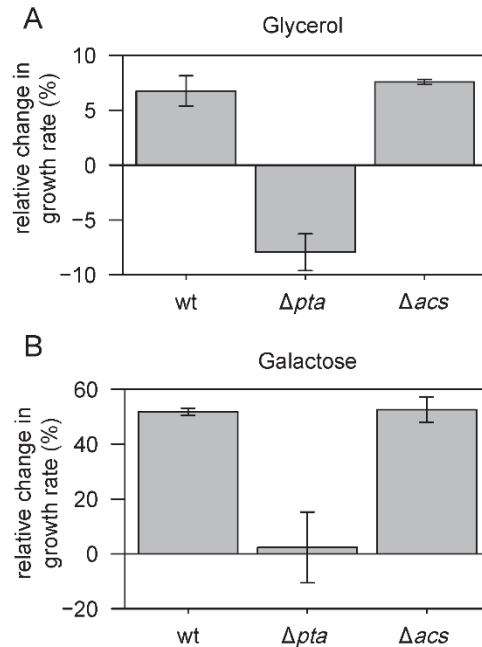

**Figure 7.** Response of *E. coli* to acetate during growth on glycerol or galactose. Impact of the presence of 10 mM acetate on the growth rate of wild-type,  $\Delta pta$ , and  $\Delta acs$  *E. coli* strains grown on (A) 30 mM glycerol and (B) 15 mM galactose. Mean values and standard deviations (error bars) were estimated from three independent biological replicates.

## Discussion

Following a systems biology approach, we used a kinetic model of *E. coli* metabolism to generate a comprehensive map of the functional relationship between glycolytic and acetate metabolisms and predict their combined impact on *E. coli* growth. In agreement with the predictions of the model, experimental results revealed a strong interplay between acetate and glycolytic fluxes in *E. coli*, with wide-ranging physiological consequences for the cells. Despite its established toxicity for microbial growth, we found that acetate improves the robustness of *E. coli* to glycolytic perturbations, and even boosts growth when the glycolytic flux is low.

Previous studies of the glycolytic control of acetate metabolism were carried out in the absence of acetate. In this situation, as observed here, glycolysis has a positive effect on acetate production. However, our results also reveal that in the presence of acetate, glycolysis negatively affects acetate utilization. Glycolytic control of the acetate flux is thus determined by the concentration of acetate itself. Because of this non-monotonous control pattern, reduced glycolytic flux increases acetate uptake and lowers the acetate concentration threshold at which acetate is co-consumed with glucose, with the overall effect of increasing acetate utilization by *E. coli*. This demonstrates that the metabolic status of acetate as a by-product or co-substrate of glycolytic carbon sources is determined both by the concentration of acetate (12, 30) and the glycolytic flux, and thus by the availability of glycolytic nutrients. This mechanism is exclusively mediated by the Pta-AckA pathway and its role and activity are determined by the nutritional conditions experienced by *E. coli*. The Pta-AckA pathway can therefore be seen as a metabolic valve that integrates information on the nutritional environment of the cells to rapidly adjust the acetate flux depending on the availability of glycolytic substrates and acetate. Our results indicate that these properties, which emerge simply from the distribution of control throughout the network, buffers the total carbon uptake flux and makes *E. coli* more robust to changes in the nutritional environment.

When the glycolytic flux is low, enhanced acetate utilization promotes *E. coli* growth, demonstrating that acetate can be beneficial to *E. coli*, even at high concentrations. Whereas 100 mM acetate has been shown to inhibit growth by ~50 % at maximal glucose uptake rates (7, 12, 13), we observed that acetate at concentrations up to 60 mM had a positive effect on growth at low glucose uptake rates. The positive effect of acetate on *E. coli* growth at (artificially) low glucose uptake rates was confirmed on glycerol and galactose, two other glycolytic substrates with a naturally low glycolytic flux. Since the impact of acetate on growth is partly determined by the glycolytic flux, this metabolic by-product is not toxic *per se*. Importantly, these results also weaken several hypotheses that have been proposed to explain the apparent “toxicity” of acetate for microbial growth. Indeed, perturbations of the proton gradient, of the anion composition of the cell, or of methionine biosynthesis, would have a monotonic impact on growth. The results of this study indicate that mechanisms that only explain growth inhibition at high glycolytic flux are inadequate. The slight but global activating effect of acetate on the transcriptome at low glycolytic flux, which correlates with the growth response, also contrasts with its inhibitory effect at high glycolytic flux. The regulatory effect of acetate on *E. coli* metabolism is therefore more complex than previously suggested (30) and should be investigated further.

Although it was not initially developed to address the questions of this study, the kinetic model used here successfully predicts the observed interplay between glycolytic and acetate metabolisms, as well as the beneficial effect of acetate on *E. coli* growth at low glycolytic flux. Since the model does not account for the activation by acetate of the expression of glucose uptake, glycolytic, and ribosomal genes, this suggests that transcriptional activation by acetate

may not be crucial for the flux response of *E. coli*. The metabolic network may indeed directly sense and integrate the availability of glucose and acetate to coordinate glucose and acetate fluxes, as already reported for the coordination other metabolic processes (44-46). In keeping with this hypothesis, our results support the concept of acetate flux being thermodynamically controlled by acetate itself (12). Metabolic regulation is thus (at least partly) responsible for the interplay between acetate and glycolytic flux. The precise regulatory program driven by acetate remains to be identified.

Acetate concentrations in the gut range from 30 to 100 mM (12) and glycolytic nutrients, such as glycerol and galactose (39, 47, 48), are generally scarce. Given the established inhibition of microbial growth by acetate, these high acetate levels were considered detrimental to *E. coli* colonization. Our results indicate that acetate, far from being toxic, may in fact be beneficial to *E. coli* in this environment. Acetate enhances *E. coli* growth when glycolytic substrates are limiting and may therefore facilitate its colonization and survival in the gut. Moreover, acetate stabilizes growth when the glycolytic flux is perturbed by temporary nutrient shortages, which are frequent in the gut. We suggest that the underlying regulatory mechanism may therefore be optimal for *E. coli* in its natural environment. Our results also call for the role of acetate in the gut to be reconsidered, since it represents a valuable and abundant resource that may benefit *E. coli* and other microorganisms.

In biotechnology, developing efficient strategies to overcome the negative effects of acetate requires understanding what controls the acetate flux and how in turn acetate controls microbial metabolism. By addressing these two needs, our findings should immediately help design bioprocesses with reduced acetate overflow and accelerate the development of mixed feed processes in which acetate is utilized alongside glucose or other glycolytic substrates. Current strategies are mainly based on increasing Acs activity to (re)use acetate present in the feedstock, provided as a co-substrate or produced by the Pta-AckA pathway. Given the Pta-AckA pathway produces one ATP and Acs consumes two ATPs, strategies based on activating the Pta-AckA-Acs cycle are highly energy-consuming (20). Strategies involving the Pta-AckA pathway alone are inherently less costly for the cell. Our results show that the Pta-AckA pathway enables efficient co-utilization of acetate and glycolytic substrates (glucose, glycerol, galactose) in *E. coli* by itself, with a positive effect on growth. The comprehensive understanding of the relationship between glycolytic and acetate metabolisms provided by this study may also represents a valuable guide to increase the productivity of valuable products synthesized from acetate-derived AcCoA (49, 50).

*E. coli* is not the only microorganism that co-consumes glucose with fermentation by-products. *Saccharomyces cerevisiae* can co-consume ethanol and glucose (51, 52), and mammalian cells co-consume lactate with glucose (53-56). Our findings may thus be generalizable to other microorganisms. Glycolytic control of fermentative pathways has indeed been observed in virtually all microorganisms. Our results explain why co-consumption of ethanol with glucose in yeast requires a reduction in glucose uptake (51). A similar relationship between glycolytic and lactate fluxes has also been reported *in vitro* in mammalian cells (57), with the switch between lactate production and utilization being determined by the glycolytic flux. It has been suggested that lactate rather than glucose is the primary circulating energy source in the human body (54, 56). Our study demonstrates that similarly to lactate, acetate is not a deleterious waste product but a valuable nutrient that can be shuttled between cells. The reversible Pta-AckA pathway enables uncoupling of glycolysis from the TCA cycle, indicating that this evolutionarily conserved design principle of eukaryotic metabolism (52) is also present in bacteria. As a nutrient and global regulator of microbial metabolism, acetate plays a major role in cellular, microbial community and host-level carbon and energy homeostasis.

## Materials and Methods

**Strains.** *Escherichia coli* K-12 MG1655 was chosen as the model wild-type strain.  $\Delta pta$  and  $\Delta acs$  mutants were constructed from wild-type *E. coli* K-12 BW25113 from the KEIO collection (58) after kanamycin cassette removal (59). The genes *pta* and *acs* were individually deleted by CRISPR-Cas9 genome editing using the method and plasmids described in Wei et al. (60). *pta* deletion was confirmed by genome sequencing and *acs* deletion by PCR.

**Growth conditions.** *E. coli* was grown in M9 minimal media (61) supplemented with 15 mM glucose, 15 mM galactose, or 30 mM glycerol. Sodium acetate (prepared as a 1.6 M solution at pH 7.0) and methyl  $\alpha$ -D-glucopyranoside ( $\alpha$ MG, prepared as a 1.2 M solution) were added up to the required concentrations. The cells were grown in shake flasks at 37 °C and 200 rpm, in 50 mL of medium. Growth was monitored by measuring the optical density (OD) at 600 nm using a Genesys 6 spectrophotometer (Thermo, USA). Biomass concentrations were determined using a conversion factor of 0.37 g<sub>DW</sub>/L/OD unit (62).

**Transcriptomics experiments.** Cells were grown in M9 medium with 15 mM glucose, 100 mM  $\alpha$ MG, and 0, 10, 50, or 100 mM acetate. Sample preparations and transcriptomics analyses were carried out as described by Millard et al. (30). Three independent replicates were analyzed for each condition. The transcriptomics data can be downloaded from the ArrayExpress database ([www.ebi.ac.uk/arrayexpress](http://www.ebi.ac.uk/arrayexpress)) under accession number E-MTAB-11717. Transcriptomics data in the absence of glycolytic inhibition (ArrayExpress database accession number E-MTAB-9086 (30)) were measured under the exact same conditions but without  $\alpha$ MG.

**Metabolomics experiments.** Extracellular concentrations of glucose and acetate were quantified in 180  $\mu$ L of filtered broth (0.2  $\mu$ m syringe filter, Sartorius, Germany) by 1D <sup>1</sup>H-NMR on a Bruker Avance 500 MHz spectrometer equipped with a 5-mm z-gradient BBI probe (Bruker, Germany), as described previously (30).

**Flux calculation.** Glucose uptake, acetate and growth rates were calculated from glucose, acetate and biomass concentration–time profiles using PhysioFit (v1.0.2, <https://github.com/MetaSys-LISBP/PhysioFit>) (63).

**Kinetic modeling.** We used Millard et al.'s kinetic model of *E. coli* (30), available from the BiModels database (<https://www.ebi.ac.uk/biomodels>) (64) under identifier MODEL2005050001. Simulations were carried out as described in the main text, using COPASI (65) (v4.34) with the CoRC package (66) (COPASI R Connector v0.11, <https://github.com/jpahle/CoRC>) in R (v4.1.3, <https://www.r-project.org>). The scripts used to perform the simulations and to generate the figures are provided in the Supporting information (Software S1) and at [https://github.com/MetaSys-LISBP/glucose\\_acetate\\_interplay](https://github.com/MetaSys-LISBP/glucose_acetate_interplay).

**Statistical analyses.** Comparisons between strains or conditions were performed using Student's t-tests with two-tailed distributions. The scripts used to perform the calculations are provided in the Supporting information (Software S1) and at [https://github.com/MetaSys-LISBP/glucose\\_acetate\\_interplay](https://github.com/MetaSys-LISBP/glucose_acetate_interplay).

## Acknowledgments

The authors thank MetaboHub-MetaToul (Metabolomics and Fluxomics facilities, Toulouse, France, <http://www.metatoul.fr>), part of the French National Infrastructure for Metabolomics and Fluxomics (<http://www.metabohub.fr/>) funded by the ANR (MetaboHUB-ANR-11-INBS-0010), for access to NMR facilities. The authors are grateful to Edith Vidal and Abdulrahman Khabbaz for help with the growth experiments, and the following INSA Toulouse students for help with the growth and transcriptomics experiments: Lola Blayac, Arno Bruel, Alexis Charbinat, Romane Ducloux, Justine Dumas-Perdriau, Solène Frapard, Sophie Germain, Benjamin Jung, Oliver



Larrousse, Nicolas Papadopoulos, Marine Rodeghiero, Leyre Sarrias and Auriane Thomas. The authors also thank the Département Génie Biologique of INSA Toulouse and the Département MICA of the INRAE for ongoing support, and Guy Lippens and Jean-Charles Portais for insightful discussions on the manuscript.

## References

1. Harden A (1901) The chemical action of *Bacillus coli communis* and similar organisms on carbohydrates and allied compounds. *J. Chem. Soc. Trans.* 79:610-628.
2. Pasteur L (1857) Mémoire sur la fermentation alcoolique. *Comptes Rendus Séances de l'Academie des Sciences* 45:913-916.
3. Warburg O, Wind F, & Negelein E (1927) The metabolism of tumors in the body. *J Gen Physiol* 8(6):519-530.
4. Trcek J, Mira NP, & Jarboe LR (2015) Adaptation and tolerance of bacteria against acetic acid. *Appl Microbiol Biotechnol* 99(15):6215-6229.
5. Kutscha R & Pflügl S (2020) Microbial upgrading of acetate into value-added products—Examining microbial diversity, bioenergetic constraints and metabolic engineering approaches. *International journal of molecular sciences* 21(22):8777.
6. Hollowell CA & Wolin MJ (1965) Basis for the exclusion of *Escherichia coli* from the rumen ecosystem. *Appl Microbiol* 13(6):918-924.
7. Luli GW & Strohl WR (1990) Comparison of growth, acetate production, and acetate inhibition of *Escherichia coli* strains in batch and fed-batch fermentations. *Appl Environ Microbiol* 56(4):1004-1011.
8. Russel JB (1992) Another explanation for the toxicity of fermentation acids at low pH: anion accumulation versus uncoupling. *J Appl Bacteriol* 73(5):363-370.
9. Roe AJ, McLaggan D, Davidson I, O'Byrne C, & Booth IR (1998) Perturbation of anion balance during inhibition of growth of *Escherichia coli* by weak acids. *J Bacteriol* 180(4):767-772.
10. Roe AJ, O'Byrne C, McLaggan D, & Booth IR (2002) Inhibition of *Escherichia coli* growth by acetic acid: a problem with methionine biosynthesis and homocysteine toxicity. *Microbiology (Reading)* 148(Pt 7):2215-2222.
11. Warnecke T & Gill RT (2005) Organic acid toxicity, tolerance, and production in *Escherichia coli* biorefining applications. *Microb Cell Fact* 4:25.
12. Enjalbert B, Millard P, Dinclaux M, Portais JC, & Letisse F (2017) Acetate fluxes in *Escherichia coli* are determined by the thermodynamic control of the Pta-AckA pathway. *Scientific reports* 7:42135.
13. Pinhal S, Ropers D, Geiselman J, & de Jong H (2019) Acetate metabolism and the inhibition of bacterial growth by acetate. *J Bacteriol* 201(13).
14. Beck AE, et al. (2022) Environment constrains fitness advantages of division of labor in microbial consortia engineered for metabolite push or pull interactions. *mSystems*:e0005122.
15. Wolfe AJ, et al. (2003) Evidence that acetyl phosphate functions as a global signal during biofilm development. *Mol Microbiol* 48(4):977-988.
16. Weinert BT, et al. (2013) Acetyl-phosphate is a critical determinant of lysine acetylation in *E. coli*. *Molecular cell* 51(2):265-272.
17. Klinke HB, Thomsen AB, & Ahring BK (2004) Inhibition of ethanol-producing yeast and bacteria by degradation products produced during pre-treatment of biomass. *Appl Microbiol Biotechnol* 66(1):10-26.
18. Palmqvist E & Hahn-Hägerdal B (2000) Fermentation of lignocellulosic hydrolysates. I: inhibition and detoxification. *Bioresource Technology* 74(1).
19. Sun L, et al. (2021) Complete and efficient conversion of plant cell wall hemicellulose into high-value bioproducts by engineered yeast. *Nat Commun* 12(1):4975.



20. Valgepea K, *et al.* (2010) Systems biology approach reveals that overflow metabolism of acetate in *Escherichia coli* is triggered by carbon catabolite repression of acetyl-CoA synthetase. *BMC Syst Biol* 4:166.
21. Nanchen A, Schicker A, & Sauer U (2006) Nonlinear dependency of intracellular fluxes on growth rate in miniaturized continuous cultures of *Escherichia coli*. *Appl Environ Microbiol* 72(2):1164-1172.
22. Renilla S, *et al.* (2012) Acetate scavenging activity in *Escherichia coli*: interplay of acetyl-CoA synthetase and the PEP-glyoxylate cycle in chemostat cultures. *Appl Microbiol Biotechnol* 93(5):2109-2124.
23. Fuentes LG, *et al.* (2013) Modification of glucose import capacity in *Escherichia coli*: physiologic consequences and utility for improving DNA vaccine production. *Microb Cell Fact* 12:42.
24. Bernal V, Castano-Cerezo S, & Canovas M (2016) Acetate metabolism regulation in *Escherichia coli*: carbon overflow, pathogenicity, and beyond. *Appl Microbiol Biotechnol* 100(21):8985-9001.
25. Eiteman MA & Altman E (2006) Overcoming acetate in *Escherichia coli* recombinant protein fermentations. *Trends Biotechnol* 24(11):530-536.
26. Peebo K, *et al.* (2014) Coordinated activation of PTA-ACS and TCA cycles strongly reduces overflow metabolism of acetate in *Escherichia coli*. *Appl Microbiol Biotechnol* 98(11):5131-5143.
27. De Mey M, De Maeseneire S, Soetaert W, & Vandamme E (2007) Minimizing acetate formation in *E. coli* fermentations. *J Ind Microbiol Biotechnol* 34(11):689-700.
28. Krivoruchko A, Zhang Y, Siewers V, Chen Y, & Nielsen J (2015) Microbial acetyl-CoA metabolism and metabolic engineering. *Metab Eng* 28:28-42.
29. Wei N, Quarterman J, Kim SR, Cate JH, & Jin YS (2013) Enhanced biofuel production through coupled acetic acid and xylose consumption by engineered yeast. *Nat Commun* 4:2580.
30. Millard P, Enjalbert B, Uttenweiler-Joseph S, Portais JC, & Letisse F (2021) Control and regulation of acetate overflow in *Escherichia coli*. *Elife* 10.
31. Wolfe AJ (2005) The acetate switch. *Microbiol Mol Biol Rev* 69(1):12-50.
32. Shen Q, Zhao L, & Tuohy KM (2011) High-level dietary fibre up-regulates colonic fermentation and relative abundance of saccharolytic bacteria within the human faecal microbiota *in vitro*. *European journal of nutrition*.
33. de Graaf AA, *et al.* (2010) Profiling human gut bacterial metabolism and its kinetics using [ $^{13}\text{C}$ ]glucose and NMR. *NMR Biomed* 23(1):2-12.
34. Kleman GL & Strohl WR (1994) Acetate metabolism by *Escherichia coli* in high-cell-density fermentation. *Appl Environ Microbiol* 60(11):3952-3958.
35. Jones SA, *et al.* (2007) Respiration of *Escherichia coli* in the mouse intestine. *Infect Immun* 75(10):4891-4899.
36. Cummings JH, Macfarlane GT, & Englyst HN (2001) Prebiotic digestion and fermentation. *Am J Clin Nutr* 73(2 Suppl):415S-420S.
37. Macfarlane GT, Gibson GR, & Cummings JH (1992) Comparison of fermentation reactions in different regions of the human colon. *J Appl Bacteriol* 72(1):57-64.
38. Cummings JH & Englyst HN (1987) Fermentation in the human large intestine and the available substrates. *Am J Clin Nutr* 45(5 Suppl):1243-1255.
39. Fabich AJ, *et al.* (2008) Comparison of carbon nutrition for pathogenic and commensal *Escherichia coli* strains in the mouse intestine. *Infect Immun* 76(3):1143-1152.
40. Bren A, *et al.* (2016) Glucose becomes one of the worst carbon sources for *E. coli* on poor nitrogen sources due to suboptimal levels of cAMP. *Scientific reports* 6:24834.
41. Negrete A, Ng WI, & Shiloach J (2010) Glucose uptake regulation in *E. coli* by the small RNA SgrS: comparative analysis of *E. coli* K-12 (JM109 and MG1655) and *E. coli* B (BL21). *Microb Cell Fact* 9:75.
42. Rohwer JM, Meadow ND, Roseman S, Westerhoff HV, & Postma PW (2000) Understanding glucose transport by the bacterial phosphoenolpyruvate:glycose

- phosphotransferase system on the basis of kinetic measurements *in vitro*. *J Biol Chem* 275(45):34909-34921.
43. Gerosa L, *et al.* (2015) Pseudo-transition Analysis Identifies the Key Regulators of Dynamic Metabolic Adaptations from Steady-State Data. *Cell systems* 1(4):270-282.
  44. Millard P, Smallbone K, & Mendes P (2017) Metabolic regulation is sufficient for global and robust coordination of glucose uptake, catabolism, energy production and growth in *Escherichia coli*. *PLoS Comput Biol* 13(2):e1005396.
  45. Doucette CD, Schwab DJ, Wingreen NS, & Rabinowitz JD (2011) alpha-Ketoglutarate coordinates carbon and nitrogen utilization via enzyme I inhibition. *Nat Chem Biol* 7(12):894-901.
  46. Yuan J, *et al.* (2009) Metabolomics-driven quantitative analysis of ammonia assimilation in *E. coli*. *Mol Syst Biol* 5:302.
  47. Snider TA, Fabich AJ, Conway T, & Clinkenbeard KD (2009) *E. coli* O157:H7 catabolism of intestinal mucin-derived carbohydrates and colonization. *Vet Microbiol* 136(1-2):150-154.
  48. Matamouros S, *et al.* (2018) Adaptation of commensal proliferating *Escherichia coli* to the intestinal tract of young children with cystic fibrosis. *Proc Natl Acad Sci U S A* 115(7):1605-1610.
  49. Becker J & Wittmann C (2015) Advanced biotechnology: metabolically engineered cells for the bio-based production of chemicals and fuels, materials, and health-care products. *Angew Chem Int Ed Engl* 54(11):3328-3350.
  50. Zhang H, Pereira B, Li Z, & Stephanopoulos G (2015) Engineering *Escherichia coli* coculture systems for the production of biochemical products. *Proc Natl Acad Sci U S A* 112(27):8266-8271.
  51. Raamsdonk LM, *et al.* (2001) Co-consumption of sugars or ethanol and glucose in a *Saccharomyces cerevisiae* strain deleted in the HXK2 gene. *Yeast* 18(11):1023-1033.
  52. Xiao T, Khan A, Shen Y, Chen L, & Rabinowitz JD (2022) Glucose feeds the tricarboxylic acid cycle via excreted ethanol in fermenting yeast. *Nat Chem Biol*.
  53. Hui S, *et al.* (2017) Glucose feeds the TCA cycle via circulating lactate. *Nature* 551(7678):115-118.
  54. Rabinowitz JD & Enerbäck S (2020) Lactate: the ugly duckling of energy metabolism. *Nature Metabolism* 2:566-571.
  55. Hui S, *et al.* (2020) Quantitative fluxomics of circulating metabolites. *Cell Metab* 32(4):676-688 e674.
  56. Faubert B, *et al.* (2017) Lactate metabolism in human lung tumors. *Cell* 171(2):358-371 e359.
  57. Mulukutla BC, Gramer M, & Hu WS (2012) On metabolic shift to lactate consumption in fed-batch culture of mammalian cells. *Metab Eng* 14(2):138-149.
  58. Baba T, *et al.* (2006) Construction of *Escherichia coli* K-12 in-frame, single-gene knockout mutants: the Keio collection. *Mol Syst Biol* 2:2006 0008.
  59. Datsenko KA & Wanner BL (2000) One-step inactivation of chromosomal genes in *Escherichia coli* K-12 using PCR products. *Proc Natl Acad Sci U S A* 97(12):6640-6645.
  60. Jiang Y, *et al.* (2015) Multigene editing in the *Escherichia coli* genome via the CRISPR-Cas9 system. *Appl Environ Microbiol* 81(7):2506-2514.
  61. Millard P, Massou S, Wittmann C, Portais JC, & Letisse F (2014) Sampling of intracellular metabolites for stationary and non-stationary <sup>13</sup>C metabolic flux analysis in *Escherichia coli*. *Anal Biochem* 465:38-49.
  62. Revelles O, *et al.* (2013) The carbon storage regulator (Csr) system exerts a nutrient-specific control over central metabolism in *Escherichia coli* strain Nissle 1917. *PLoS One* 8(6):e66386.
  63. Peiro C, *et al.* (2019) Chemical and metabolic controls on dihydroxyacetone metabolism lead to suboptimal growth of *Escherichia coli*. *Appl Environ Microbiol* 85(15).
  64. Chelliah V, *et al.* (2015) BioModels: ten-year anniversary. *Nucleic Acids Res* 43(Database issue):D542-548.

65. Hoops S, *et al.* (2006) COPASI--a CComplex PAtchway Simulator. *Bioinformatics* 22(24):3067-3074.
66. Forster J, Bergmann FT, & Pahle J (2020) CoRC - the COPASI R Connector. *Bioinformatics*.

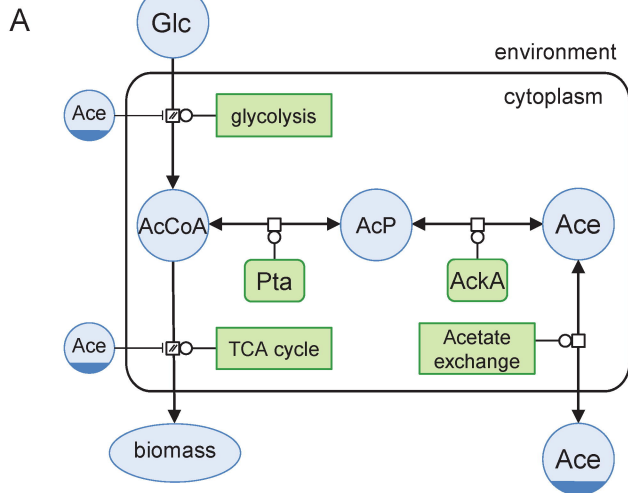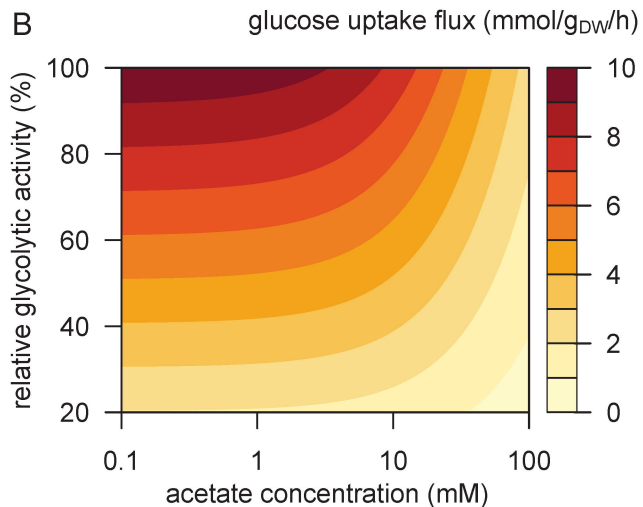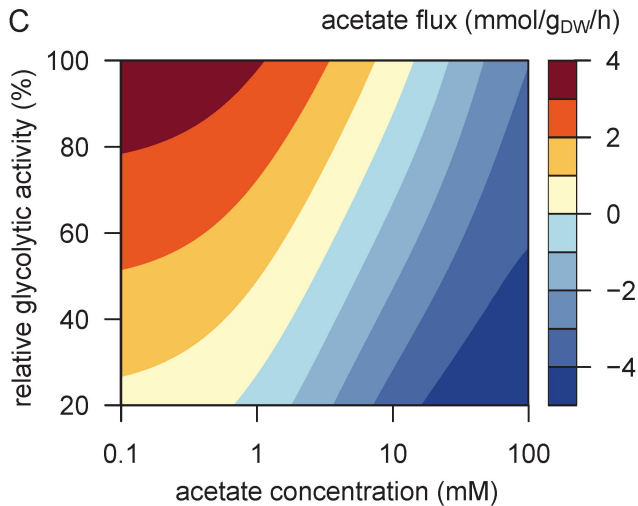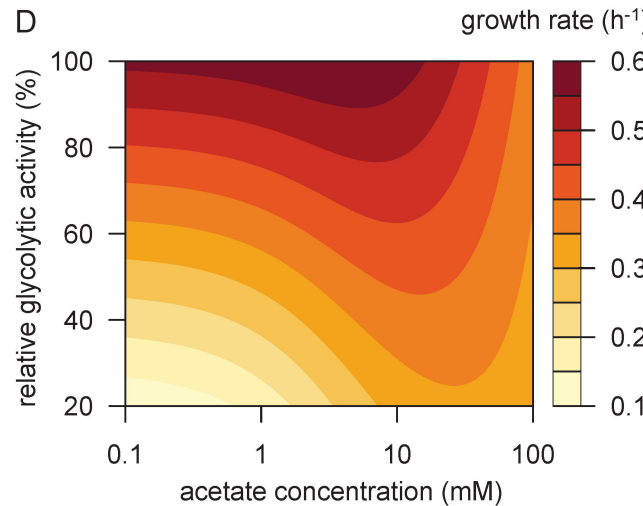

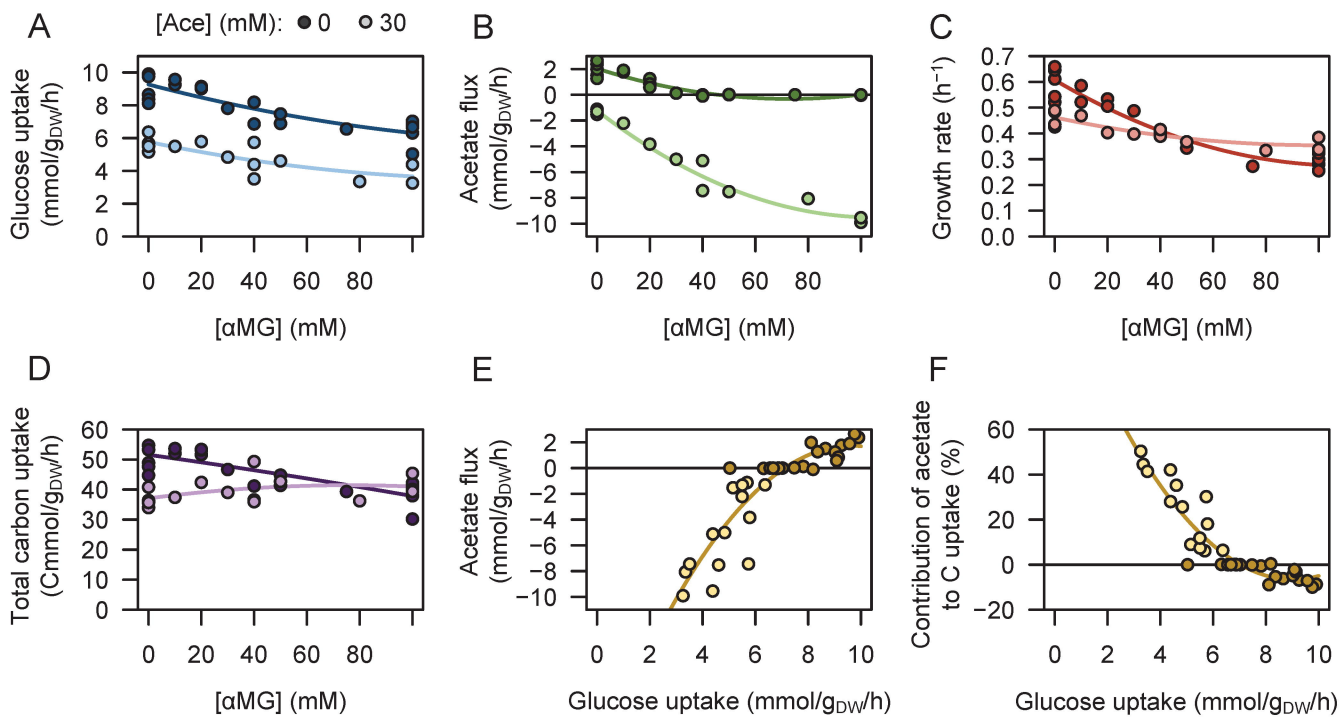

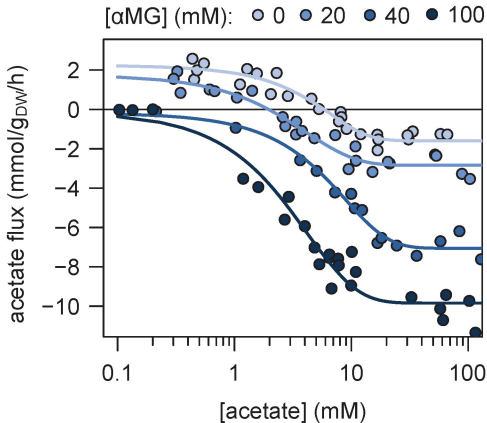



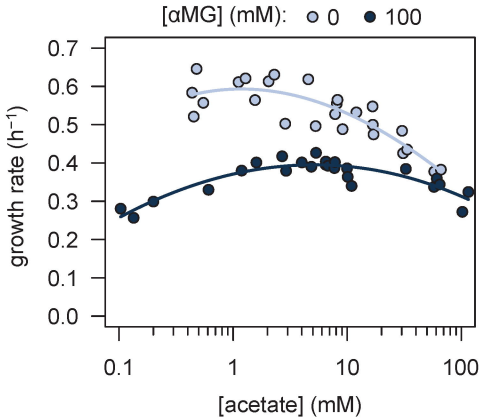

A

| $\alpha$ MG (mM)             | 0       |         |         | 100     |         |         |
|------------------------------|---------|---------|---------|---------|---------|---------|
| Acetate (mM)                 | 10      | 50      | 100     | 10      | 50      | 100     |
| response to stress           | 7.5E-03 | 1.2E-10 | 2.2E-14 |         |         |         |
| response to pH               | 1.4E-08 | 1.4E-07 | 1.7E-09 |         |         | 6.5E-03 |
| response to oxidative stress |         | 4.8E-04 | 4.8E-08 |         |         |         |
| response to osmotic stress   | 1.9E-03 | 4.7E-06 | 7.1E-07 |         |         | 5.5E-05 |
| locomotion                   |         | 5.8E-39 | 6.8E-30 |         |         |         |
| cytochrome assembly          | 8.8E-06 | 1.6E-03 | 8.8E-06 |         |         |         |
| ATP biosynthetic process     |         |         | 3.3E-09 |         |         |         |
| respiratory chain            |         |         |         | 1.0E-07 | 2.8E-10 |         |
| transport                    | 9.1E-09 | 5.8E-12 | 6.5E-16 |         | 1.0E-07 | 3.8E-17 |
| ion transport                | 2.5E-09 | 6.9E-10 | 1.1E-12 |         |         | 1.6E-04 |
| peptide transport            | 8.5E-03 | 1.4E-05 | 4.9E-05 |         |         |         |
| carbohydrate transport       | 6.2E-03 |         |         |         | 4.3E-09 | 9.2E-25 |
| catabolic process            | 6.2E-03 |         | 1.0E-03 |         | 7.9E-09 | 3.7E-10 |
| glutamate catabolism         | 1.4E-04 | 1.4E-03 | 6.1E-03 | 4.5E-03 | 1.5E-04 | 8.0E-03 |
| methionine biosynthesis      |         |         |         |         | 2.9E-07 | 3.1E-03 |
| ribonucleoside biosynthesis  |         |         |         |         | 2.1E-03 | 5.1E-11 |
| amino acid biosynthesis      |         |         |         |         | 2.2E-07 | 1.2E-04 |

B

| $\alpha$ MG (mM)               | 0    |     |     |     | 100 |     |     |     |     |
|--------------------------------|------|-----|-----|-----|-----|-----|-----|-----|-----|
| Acetate (mM)                   | 0    | 10  | 50  | 100 | 0   | 10  | 50  | 100 |     |
| Glc uptake                     | ptsG | 1.0 | 0.6 | 0.4 | 0.2 | 1.0 | 1.8 | 1.6 | 1.2 |
|                                | ptsH | 1.0 | 0.7 | 0.5 | 0.4 | 1.0 | 1.2 | 1.1 | 1.0 |
|                                | ptsI | 1.0 | 0.9 | 0.7 | 0.7 | 1.0 | 1.1 | 0.9 | 0.8 |
|                                | crr  | 1.0 | 1.0 | 0.8 | 0.7 | 1.0 | 1.2 | 1.0 | 0.8 |
|                                | glk  | 1.0 | 0.7 | 0.6 | 0.6 | 1.0 | 1.4 | 1.1 | 0.6 |
|                                |      |     |     |     |     |     |     |     |     |
| Upper glycolysis               | pgi  | 1.0 | 1.1 | 0.9 | 1.0 | 1.0 | 1.3 | 1.6 | 1.8 |
|                                | pfkA | 1.0 | 1.1 | 0.9 | 1.1 | 1.0 | 1.6 | 1.6 | 1.3 |
|                                | pfkB | 1.0 | 1.6 | 3.7 | 7.5 | 1.0 | 1.1 | 2.3 | 4.2 |
|                                | fbaA | 1.0 | 1.1 | 1.0 | 1.1 | 1.0 | 1.2 | 1.5 | 1.5 |
|                                | fbaB | 1.0 | 1.9 | 3.8 | 6.9 | 1.0 | 0.7 | 0.8 | 1.6 |
|                                | tpiA | 1.0 | 1.1 | 1.2 | 1.3 | 1.0 | 1.3 | 1.6 | 1.5 |
| Lower glycolysis               | gapA | 1.0 | 0.9 | 0.9 | 0.6 | 1.0 | 2.2 | 1.9 | 1.5 |
|                                | pgk  | 1.0 | 1.0 | 0.7 | 0.9 | 1.0 | 1.6 | 1.5 | 1.5 |
|                                | gpmA | 1.0 | 0.9 | 0.8 | 0.7 | 1.0 | 1.4 | 1.4 | 1.1 |
|                                | eno  | 1.0 | 1.0 | 0.7 | 0.6 | 1.0 | 1.8 | 2.1 | 1.8 |
|                                | pykA | 1.0 | 1.0 | 0.9 | 1.1 | 1.0 | 1.4 | 1.2 | 0.8 |
|                                | pykF | 1.0 | 0.8 | 0.7 | 0.7 | 1.0 | 1.3 | 1.1 | 1.5 |
|                                | aceE | 1.0 | 0.8 | 0.8 | 0.7 | 1.0 | 1.3 | 1.8 | 0.9 |
|                                | aceF | 1.0 | 1.1 | 0.9 | 1.0 | 1.0 | 1.4 | 1.7 | 1.1 |
|                                |      |     |     |     |     |     |     |     |     |
|                                |      |     |     |     |     |     |     |     |     |
| Anaplerotic                    | ppc  | 1.0 | 0.9 | 0.7 | 0.9 | 1.0 | 1.0 | 1.3 | 1.4 |
|                                | pck  | 1.0 | 0.7 | 0.4 | 0.2 | 1.0 | 1.3 | 1.1 | 0.6 |
|                                | maeA | 1.0 | 1.0 | 1.0 | 1.1 | 1.0 | 1.0 | 2.1 | 1.9 |
|                                | maeB | 1.0 | 1.0 | 0.6 | 0.5 | 1.0 | 1.2 | 0.9 | 0.6 |
|                                |      |     |     |     |     |     |     |     |     |
|                                |      |     |     |     |     |     |     |     |     |
|                                |      |     |     |     |     |     |     |     |     |
|                                |      |     |     |     |     |     |     |     |     |
|                                |      |     |     |     |     |     |     |     |     |
|                                |      |     |     |     |     |     |     |     |     |
| Acetate                        | pta  | 1.0 | 1.0 | 1.1 | 1.1 | 1.0 | 1.5 | 1.4 | 1.2 |
|                                | ackA | 1.0 | 0.9 | 1.0 | 1.1 | 1.0 | 1.8 | 1.7 | 0.8 |
|                                | acs  | 1.0 | 0.7 | 0.5 | 0.4 | 1.0 | 0.8 | 0.3 | 0.2 |
|                                | poxB | 1.0 | 2.8 | 2.6 | 8.1 | 1.0 | 0.7 | 1.1 | 1.9 |
|                                |      |     |     |     |     |     |     |     |     |
|                                |      |     |     |     |     |     |     |     |     |
|                                |      |     |     |     |     |     |     |     |     |
|                                |      |     |     |     |     |     |     |     |     |
|                                |      |     |     |     |     |     |     |     |     |
|                                |      |     |     |     |     |     |     |     |     |
|                                |      |     |     |     |     |     |     |     |     |
|                                |      |     |     |     |     |     |     |     |     |
|                                |      |     |     |     |     |     |     |     |     |
|                                |      |     |     |     |     |     |     |     |     |
| TCA cycle and glyoxylate shunt | gltA | 1.0 | 1.0 | 0.8 | 0.6 | 1.0 | 0.8 | 0.8 | 0.6 |
|                                | acnA | 1.0 | 1.2 | 1.5 | 2.2 | 1.0 | 1.0 | 1.0 | 1.3 |
|                                | acnB | 1.0 | 1.1 | 1.0 | 0.8 | 1.0 | 0.9 | 1.2 | 1.0 |
|                                | icd  | 1.0 | 1.0 | 0.8 | 0.6 | 1.0 | 1.1 | 1.2 | 1.0 |
|                                | lpd  | 1.0 | 1.0 | 0.8 | 0.7 | 1.0 | 0.9 | 1.2 | 1.1 |
|                                | sucA | 1.0 | 1.2 | 1.3 | 0.9 | 1.0 | 1.1 | 1.3 | 1.4 |
|                                | sucB | 1.0 | 1.0 | 1.0 | 0.6 | 1.0 | 1.1 | 1.3 | 1.2 |
|                                | sucC | 1.0 | 0.9 | 0.9 | 0.6 | 1.0 | 1.1 | 1.3 | 1.1 |
|                                | sucD | 1.0 | 0.9 | 0.8 | 0.5 | 1.0 | 1.1 | 1.2 | 1.0 |
|                                | sdhA | 1.0 | 1.0 | 0.9 | 0.7 | 1.0 | 0.8 | 0.9 | 0.9 |
|                                | sdhB | 1.0 | 0.9 | 0.7 | 0.5 | 1.0 | 0.8 | 0.9 | 0.8 |
|                                | sdhC | 1.0 | 1.0 | 0.8 | 0.5 | 1.0 | 0.8 | 1.0 | 1.0 |
|                                | sdhD | 1.0 | 0.9 | 0.8 | 0.5 | 1.0 | 0.8 | 0.9 | 1.0 |
|                                | fumA | 1.0 | 0.9 | 0.8 | 0.6 | 1.0 | 1.0 | 0.8 | 0.5 |
| fumB                           | 1.0  | 1.2 | 1.4 | 1.3 | 1.0 | 1.0 | 1.1 | 1.0 |     |
| fumC                           | 1.0  | 1.0 | 0.5 | 0.3 | 1.0 | 0.8 | 0.6 | 0.5 |     |
| mdh                            | 1.0  | 1.0 | 0.5 | 0.6 | 1.0 | 1.2 | 1.3 | 1.1 |     |
| mgo                            | 1.0  | 1.5 | 2.3 | 2.2 | 1.0 | 1.0 | 2.5 | 3.4 |     |
| aceA                           | 1.0  | 1.1 | 0.7 | 0.9 | 1.0 | 1.2 | 1.0 | 0.9 |     |
| aceB                           | 1.0  | 1.2 | 0.9 | 1.4 | 1.0 | 0.7 | 1.1 | 1.0 |     |

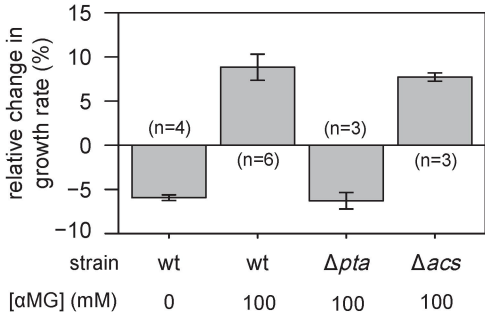

**A**

Glycerol

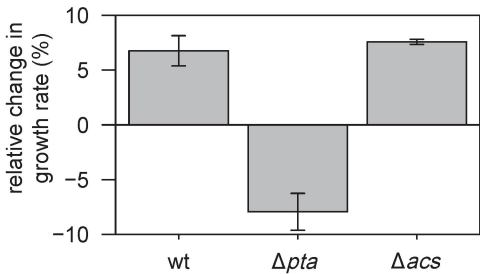**B**

Galactose

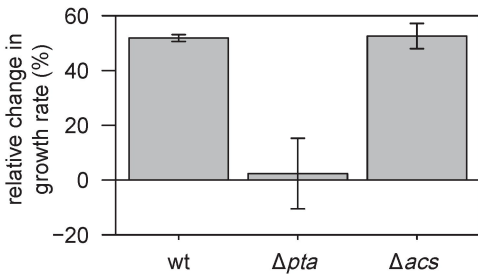

Source: https://www.biorxiv.org/content/10.1101/2022.09.20.506926v1.full.pdf
